# Supplementary material for: Immune-Escape Mutations Are Prevalent among Patients with a Coexistence of HBsAg and Anti-HBs in a Tertiary Liver Center in the United States
Source: MDPI journal article supplement (doi:10.3390/v16050713), 2024-04-30
Supplement: s1 [file s1]

**Supplemental Table S1:**

**Clinical and Virological Characteristics of 24 patients with available gene sequencing**

| <b>Case no.</b> | <b>Years since baseline</b> | <b>Age, years</b> | <b>Phenotype</b>               | <b>HBV DNA (IU/mL)</b> | <b>ALT (IU/L)</b> | <b>HBsAgNx (S/CO)</b> |
|-----------------|-----------------------------|-------------------|--------------------------------|------------------------|-------------------|-----------------------|
| 1               | 0.0                         | 60                | HBeAg (-)<br>(indeterminant)   | 326                    | 41                | 359                   |
|                 | 2.0                         | 62                | HBeAg (-) chronic infection    | 275                    | 27                | 310                   |
|                 | 4.2                         | 64                |                                | 1180                   | 21                | 324                   |
|                 | 7.0                         | 67                |                                | 200                    | 23                | 20                    |
|                 | 9.0                         | 69                |                                | 32                     | 19                | (+)                   |
| 2               | 0.0                         | 35                | HBeAg (+) on antiviral therapy | 1780                   | 42                | 5870                  |
|                 | 2.1                         | 37                |                                | 20                     | 14                | 6080                  |
|                 | 4.7                         | 40                |                                | 10                     | 14                | 5633                  |
|                 | 7.0                         | 42                |                                | <LLOD                  | 16                | 1813*                 |
| 3               | 0.0                         | 63                | HBeAg (-)<br>(indeterminant)   | 3093                   | 13                | 4538                  |
|                 | 5.2                         | 68                |                                | 3981                   | 14                | 5801                  |
|                 | 8.0                         | 71                | HBeAg (-) chronic infection    | 170                    | 12                | (+)                   |
| 4               | 0.0                         | 42                | HBeAg (-)<br>(indeterminant)   | 68                     | 43                | 287                   |
|                 | 4.2                         | 46                | HBeAg (-) chronic infection    | 20                     | 27                | 150                   |
|                 | 6.2                         | 48                |                                | 50                     | 16                | 274                   |
|                 | 8.0                         | 50                |                                | <LLOD                  | 13                | 0.54*                 |
| 5               | 0.0                         | 33                | HBeAg (-)<br>(indeterminant)   | 2985                   | 13                | 1153                  |
|                 | 1.0                         | 34                | HBeAg (-) chronic infection    | <LLOD                  | 7                 | not available         |
| 6               | 0.0                         | 25                | HBeAg (+) on antiviral therapy | 841                    | 68                | 5792                  |
|                 | 0.1                         | 25                |                                | 150                    | 46                | 5239                  |
|                 | 0.7                         | 26                |                                | 2130                   | 17                | 3364                  |
|                 | 0.8                         | 26                | HBeAg (-) chronic infection    | <20                    | 16                | 3404                  |

|    |     |    |                                   |                  |                  |                  |
|----|-----|----|-----------------------------------|------------------|------------------|------------------|
|    | 1.8 | 27 |                                   | <LLOD            | 15               | 2575             |
|    | 3.9 | 29 |                                   | <20              | 13               | 296              |
|    | 4.1 | 29 |                                   | <20              | 11               | 515              |
|    | 4.2 | 30 |                                   | <20              | 10               | 286              |
|    | 7.0 | 32 |                                   | 16               | 7                | 4.2*             |
| 7  | 0.0 | 40 | HBeAg (-) on<br>antiviral therapy | 1513             | 66               | 5944             |
|    | 3.7 | 44 |                                   | <20              | 57               | 6135             |
|    | 5.7 | 46 |                                   | <20              | 46               | 5549             |
|    | 9.0 | 49 |                                   | <LLOD            | 15               | 796*             |
| 8  | 0.0 | 68 | HBeAg (-) on<br>antiviral therapy | 65               | 26               | 6232             |
|    | 1.9 | 70 |                                   | <20              | 21               | 6181             |
|    | 3.0 | 71 |                                   | 145              | 27               | (+)              |
| 9  | 0.0 | 34 | HBeAg (-) on<br>antiviral therapy | <20              | 47               | 5718             |
|    | 2.5 | 36 |                                   | 877              | 19               | 5315             |
|    | 3.4 | 37 |                                   | <20              | 30               | 5743             |
|    | 4.0 | 38 |                                   | <LLOD            | 23               | (-)              |
| 10 | 0.0 | 29 | HBeAg (-) on<br>antiviral therapy | 2351             | 13               | 4349             |
|    | 1.8 | 31 |                                   | 22900            | 25               | 2877             |
|    | 5.2 | 34 |                                   | 500              | 16               | 627              |
|    | 8.0 | 37 |                                   | 3.2              | 16               | (-)              |
| 11 | 0.0 | 41 | HBeAg (-) chronic<br>infection    | 1470             | 33               | 6033             |
|    | 0.0 | 52 | No available                      | not<br>available | 12               | not<br>available |
| 12 | 0.0 | 34 | HBeAg (-)<br>(indeterminant)      | <40              | 46               | 4304             |
|    | 0.3 | 34 | HBeAg (-)<br>(indeterminant)      | <40              | 52               | 3573             |
|    | 0.6 | 34 | HBeAg (-) chronic<br>infection    | 60               | 28               | 4129             |
|    | 0.8 | 35 | not available                     | not<br>available | not<br>available | not<br>available |

|    |     |    |                                 |               |               |               |
|----|-----|----|---------------------------------|---------------|---------------|---------------|
| 13 | 0.0 | 69 | HBeAg (-) chronic infection     | 704           | 21            | 6082          |
|    | 1.1 | 70 |                                 | 494           | 21            | 6332          |
|    | 2.0 | 71 |                                 | <LLOD         | 32            | not available |
| 14 | 0.0 | 24 | HBeAg (+) chronic infection     | >110 million  | 21            | 4851          |
|    | 4.7 | 29 | HBeAg (+) on anti-viral therapy | UA            | 38            | 5776          |
|    | 7.3 | 32 |                                 | UA            | 75            | 4550          |
|    | 8.0 | 33 |                                 | <LLOD         | 11            | 13788*        |
| 15 | 0.0 | 33 | HBeAg (+) on anti-viral therapy | 178851        | 32            | 4178          |
|    | 0.0 | 36 |                                 | >170          | 25            | (+)           |
| 16 | 0.0 | 69 | HBeAg (-) (indeterminate)       | 26            | 44            | 4904          |
|    | 2.0 | 71 | HBeAg (-) chronic infection     | <LLOD         | 34            | 3.45          |
|    | 5.0 | 74 |                                 | <LLOD         | 20            | (-)           |
| 17 | 0.0 | 74 | HBeAg (-) chronic infection     | 144           | 20            | 1741          |
|    | 3.6 | 77 |                                 | 26            | 16            | 288           |
|    | 4.0 | 80 |                                 | <10           | 11            | (+)           |
| 18 | 0.0 | 53 | HBeAg (-) (indeterminate)       | <20           | 73            | 10            |
|    | 2.8 | 56 | HBeAg (-) on antiviral therapy  | UA            | 25            | 5191          |
|    |     | 59 |                                 | <LLOD         | 26            | (+)           |
| 19 | 0.0 | 34 | HBeAg (-) (indeterminate)       | 12,590        | 35            | 4822          |
|    |     | -  | not available                   | not available | not available | not available |
| 20 | 0.0 | 48 | HBeAg (-) chronic hepatitis     | 125, 890      | 39            | 5355          |
|    |     | 50 |                                 | <LLOD         | 25            | not available |

|    |     |    |                             |               |               |               |
|----|-----|----|-----------------------------|---------------|---------------|---------------|
| 21 | 0.0 | 31 | HBeAg (-) chronic hepatitis | 79,432,823    | 41            | 2835          |
|    |     | -  |                             | not available | not available | not available |
| 22 | 0.0 | 72 | HBeAg (-) chronic infection | 78            | 15            | 4045          |
|    | 6.0 | 78 |                             | <LLOD         | 31            | (-)           |
| 23 | 0.0 | 76 | HBeAg (-) chronic infection | 320           | 17            | 109           |
|    | 0.7 | 76 |                             | 66            | 15            | 39            |
|    | 0.8 | 77 |                             | <20           | 15            | 3.2           |
|    | 3.0 | 79 |                             | UD            | 13            | 1.95          |
|    | 3.4 | 79 |                             | UD            | 24            | 5.91          |
|    | 6.0 | 80 |                             | UD            | 14            | (-)           |
| 24 | 0.0 | 73 | HBeAg (-) chronic infection | 126           | 15            | 42            |
|    | 1.7 | 74 |                             | 22            | 20            | 12            |
|    | 6.0 | 81 |                             | <LLOD         | 18            | (-)           |

\* qHBsAg done by Quest Diagnostics Laboratories. It reported as IU/mL

Supplemental Table S2 Pre-S1, Pre-S2, S-gene mutations for the 24 patients and the consensus sequences.

| Patient number on supplemental Table 1 | preS1-S PCR | seq # | HBV Genotype | PreS1 Mutations                                               | PreS2 Mutations                                            | S Mutations, vs genotype consensus                                                                                    |
|----------------------------------------|-------------|-------|--------------|---------------------------------------------------------------|------------------------------------------------------------|-----------------------------------------------------------------------------------------------------------------------|
| 1                                      | pos         | 2     | B4           | T68I, L84I, A91T                                              | S5T, V39A, I45T, L46F                                      | V14AV, C64CY, L95W, K122R, Y161F, F200Y, Y206C, I208IT                                                                |
|                                        | pos         | 3a    | B4           | T68I, L84I, A91T                                              | S5T, V39A, I45T, L46F                                      | F80S, K122R, F158S, Y161F, F200Y, Y206C, I208T, F220C                                                                 |
|                                        | pos         | 3b    | B4           | K35Q, E39G, T68I, L84I, A91T                                  | S5T, V39A, I45T, L46F                                      | V14A., F80FS, K122R, F158S, Y161F, F200Y, I208T                                                                       |
|                                        | pos         | 4     | B4           | T68IT, L84I, A91T                                             | S5T, H9P, V39A, I45T, L46F                                 | V14AV, C64CY, L95W, K122R, Y161F, A166G, F200Y, Y206CY, I208IT                                                        |
|                                        | pos         | 5a    | B4           | T68I, L84I, A91T, N98HN                                       | S5T, V39A, I45T, L46F                                      | V14AV, S34L, C64CY, L95W, K122R, Y161F, F200Y, Y206CY, I208IT                                                         |
|                                        | pos         | 5b    | B4           | T68IT, L84I, A91T                                             | S5T, V39A, I45T, L46F                                      | V14AV, L95W, K122R, Y161F, F200Y, S204N                                                                               |
| 2                                      | pos         | 8a    | C2           | S38T, A90S                                                    | None                                                       | I28M, I126V                                                                                                           |
|                                        | pos         | 8b    | C2           | A90S                                                          | None                                                       | I126V                                                                                                                 |
|                                        | pos         | 11a   | C1           | D27G, H51Q, E54A, A60V, A62S, G73N                            | T6S, N55S                                                  | G18V, L26H, P29L, S31N, T57I, R79H, L98V, S204N, S210T                                                                |
| 3                                      | pos         | 11b   | C1           | D27G, H51Q, E54A, A60V, A62S, G73N                            | T6S                                                        | N3S, I92T, I126IM, G202A, Y206H, S210N, P211H, L216F                                                                  |
|                                        | pos         | 12    | C1           | D27G, H51Q, E54A, A60V, A62S, G73N                            | T6S                                                        | N3S, V14GV, G18V, I92T, G202A, Y206H, S210N, P211H, L216F                                                             |
|                                        | pos         | 16a   | B2           | P19T, E39A, L84I                                              | M1I, Q2R                                                   | N40S, G44E, <b>M133L</b> , Y161F, F200Y, Y206C                                                                        |
| 4                                      | pos         | 16b   | B2           | P19T, E39A, L84I                                              | M1IM, Q2RQ, A19DA                                          | N40NS, G44E, <b>M133L</b> , Y161F, F200Y, Y206C                                                                       |
|                                        | pos         | 17    | B2           | P8T, T14I, P19T, E39A, L84I                                   | M1I, Q2R, A19D                                             | N40S, G44E, <b>M133L</b> , Y161F, F200Y, Y206C, F220C                                                                 |
| 5                                      | pos         | 19    | B2           | P65T, L84I                                                    | None                                                       | F19Y, I25V, G44D, L49LP, C85CF, Y161FY, F200Y, S204R, M213I                                                           |
| 6                                      | pos         | 27    | C1           | Q10QK, P32L, G35R, N39ND, H51P, N56H, A60V, A62S, G73N, V88VI | T6S, S28N, I42T                                            | N3S, S53L, I126T, V177A, S210N                                                                                        |
| 7                                      | pos         | 33a   | C1           | Q10K, P26G, A33T, G35R, F45R, E54A, A60V, A62S, G73N          | T6S, S29F                                                  | N3S, R24K, S53L, I92T, V96G, Q101K, T115N, <b>I126S</b> , S210N                                                       |
|                                        | pos         | 33b   | C1           | Q10K, P26G, A33T, G35R, F45R, E54A, A60V, A62S, G73N, P93A    | T6S, S29F                                                  | N3S, R24K, S53L, I92T, L94LS, Q101K, T115N, <b>I126S</b> , S210N                                                      |
|                                        | neg         | 34    | neg          |                                                               |                                                            |                                                                                                                       |
|                                        | neg         | 35    | neg          |                                                               |                                                            |                                                                                                                       |
| 8                                      | pos         | 37    | B2           | F67V                                                          | W3G                                                        | A5S, L21S, G44E, T126A, M213I                                                                                         |
| 9                                      | pos         | 39    | B4           | K10Q, D54N, L84I                                              | V39A, I45T, L46F                                           | K122R, F200Y, M213I                                                                                                   |
| 10                                     | pos         | 41    | B2           | T68I, L84I                                                    | Q36P                                                       | L21LS, F200Y                                                                                                          |
|                                        | pos         | 42    | B2           | T68I, L84I                                                    | Q36P                                                       | F200Y                                                                                                                 |
|                                        | pos         | 43    | B2           | T68I, L84I                                                    | Q36P                                                       | V106A, F200Y, M213MT                                                                                                  |
| 11                                     | pos         | 46    | A1           | A54Q, L67F, I74V, T86A, S89P, T90A, I91V                      | M1IM, F8LF, L12R, P15P, R16K, Y21C, V32L, A35V, A47S, V53A | S53LS, <b>Y100C</b> , S207N, V209L                                                                                    |
| 12                                     | pos         | 50    | C2           | L74I                                                          | R48K                                                       | L95W, <b>I126S</b>                                                                                                    |
|                                        | pos         | 51    | C2           | None                                                          | T6P, T7K, R16K, L20Q, Y21N, F22L                           | M1T, L13H, F20S, W74L, L77R, V96A, L98V, T113S, S114T, T115N, G119L, <b>P120S</b> , R160K, I195T, Y206N, P214L, C221Y |
| 13                                     | pos         | 52    | C2           | G35R                                                          | None                                                       | N3S, N40S, G44E, P46L, T47K, S64C, I68T, V184A, Y200L, L213T                                                          |
|                                        | pos         | 53    | C2           | G35R                                                          | None                                                       | N3S, N40S, G44E, P46L, T47K, S64C, I68T, V184A, Y200L, F212CF, L213T                                                  |
|                                        | pos         | 54    | C2           | L74I                                                          | None                                                       | L95LW, <b>I126IS</b>                                                                                                  |
| 14                                     | pos         | 55    | C2           | L74I                                                          | None                                                       | L95LW, <b>I126S</b>                                                                                                   |
|                                        | pos         | 56    | C2           | L74I                                                          | DEL7-21, F22I                                              | P62LP, L95LW, <b>I126IS</b>                                                                                           |
|                                        | pos         | 57    | C2           | G73S                                                          | None                                                       | V184A                                                                                                                 |
| 15                                     | pos         | 58    | C2           | A90V                                                          | None                                                       | T47A, I126T, V194A, Y200F                                                                                             |
|                                        | pos         | 59    | C2           | A90V, L112M                                                   | None                                                       | L84F, V194A, Y200F                                                                                                    |
| 16                                     | pos         | 60    | B2           | None                                                          | None                                                       | N40S, V47E, M197MT, Y206C, F220C                                                                                      |
|                                        | pos         | 61    | B2           | None                                                          | None                                                       | N40S, V47E, S58C, Y206C, F220C                                                                                        |
|                                        | pos         | 62a   | C2           | L74I                                                          | R16G                                                       | L95W, <b>I126S</b>                                                                                                    |
| 17                                     | pos         | 62b   | C2           | L74I                                                          | DEL7-21, F22I                                              | P62L                                                                                                                  |
|                                        | pos         | 63    | C1           | H51Q, E54A, N56H, A60V, A62S, G73N                            | M1I, T6S, T7K, V17P                                        | R24K, S53L, P56LP, T118A, I126T, G202EG, I208IT, S210N                                                                |
|                                        | pos         | 64    | C2           | None                                                          | None                                                       | G44E, A45T, F80S, F85C, I92T, S204R, L209W, P214H                                                                     |
| 18                                     | neg         | 69    | B4           | H48Y, L84I                                                    | V39A, I45T, L46F                                           | S55FS, C76Y, K122R, M198I, F200Y, M213I                                                                               |
| 19                                     | pos         | 70    | B4           | N51T, T68I, L84I                                              | V39A, I45T, L46F                                           | K122R, F200Y                                                                                                          |
| 20                                     | pos         |       | B2           | P65T, L84I, S101T                                             | None                                                       | <b>M133L</b> , F200Y, L216F                                                                                           |
|                                        | pos         |       | B2           | L85F                                                          | K48KT                                                      | S31SN, N40S, G44GE, V47E, L49LP, I68IT, A159V, Y206C, I218IL, F220FL                                                  |
|                                        | pos         |       | B2           | L85F, S109T                                                   | S44L, T49TI, P52L, P54T                                    | N40S, V47E, L94LS, Y100FS, Q101QK, A159V, I208IT, F220L                                                               |
| 21                                     | pos         |       | B            | E44D, A60S, L84I, S101L                                       | S33N, A35V, V39A, A41S, V53A                               | S113P, T116N, K122R, F134C, T140S, A159V, L175S, S204N, N207R                                                         |
|                                        | pos         |       | B            | L84I, D49DN, S101L, A60S, L84I, S101L                         | Q10K, S33N, A35V, V39VA, A41S, V53A                        | F41FS, G44A, V47E, Q51QL, S59SN, I68IT, K122R, <b>T131N</b> , <b>M133T</b> , T140I, F200L,                            |

|                   |                                                               |    |    |    |    |    |
|-------------------|---------------------------------------------------------------|----|----|----|----|----|
|                   | 10                                                            | 20 | 30 | 40 | 50 | 60 |
| Consensus A preS1 | MGGWSSKPRKGMGTNLVSPNPLGFFPDHQLDPAFGANSNNPDWDFNPIKDHWPAAANQVGV |    |    |    |    |    |
| A1-46a-1201       | .....Q.....                                                   |    |    |    |    |    |
| A1-46b-1201       | .....Q.....                                                   |    |    |    |    |    |

|                   |                                                             |    |    |     |     |
|-------------------|-------------------------------------------------------------|----|----|-----|-----|
|                   | 70                                                          | 80 | 90 | 100 | 110 |
| Consensus A preS1 | GAFGPGLTPPHGGILGWSPQAQGILTTVSTIPPPASTNRQSGRQPTPLSPPLRDSHPQA |    |    |     |     |
| A1-46a-1201       | .....F.....V.....A..PAV.....                                |    |    |     |     |
| A1-46b-1201       | .....F.....V.....A..PAV.....                                |    |    |     |     |

|                   |                                                              |    |    |    |    |    |
|-------------------|--------------------------------------------------------------|----|----|----|----|----|
|                   | 10                                                           | 20 | 30 | 40 | 50 | 60 |
| Consensus B preS1 | MGGWSSKPRKGMGTNLVSPNPLGFFPDHQLDPAFKANSENPDWDLNPHKDNWPDANKVGV |    |    |    |    |    |
| B4-2a-1201        | .....                                                        |    |    |    |    |    |
| B4-2b-1201        | .....                                                        |    |    |    |    |    |
| B4-3a-1201        | .....                                                        |    |    |    |    |    |
| B4-3b-1201        | .....Q..G.....                                               |    |    |    |    |    |
| B4-4a-1201        | .....                                                        |    |    |    |    |    |
| B4-4b-1201        | .....                                                        |    |    |    |    |    |
| B4-5a-1201        | .....                                                        |    |    |    |    |    |
| B4-5b-1201        | .....                                                        |    |    |    |    |    |
| B2-16a-1201       | .....T.....A.....                                            |    |    |    |    |    |
| B2-16b-2101       | .....T.....A.....                                            |    |    |    |    |    |
| B2-17b-1201       | .....T.....I.....T.....A.....                                |    |    |    |    |    |
| B2-18b-1201       | .....LT.S.....A.....                                         |    |    |    |    |    |
| B2-19b-1201       | .....                                                        |    |    |    |    |    |
| B2-37b-1201       | .....                                                        |    |    |    |    |    |
| B4-39a-1201       | .....Q.....N.....                                            |    |    |    |    |    |
| B4-39b-1201       | .....Q.....N.....                                            |    |    |    |    |    |
| B2-41a-1201       | .....                                                        |    |    |    |    |    |
| B2-41b-1201       | .....                                                        |    |    |    |    |    |
| B2-42a-1201       | .....                                                        |    |    |    |    |    |
| B2-42b-1201       | .....                                                        |    |    |    |    |    |
| B2-43a-1201       | .....                                                        |    |    |    |    |    |
| B2-43b-1201       | .....                                                        |    |    |    |    |    |
| B2-60a-1201       | .....                                                        |    |    |    |    |    |
| B2-60b-1201       | .....                                                        |    |    |    |    |    |
| B2-61a-1201       | .....                                                        |    |    |    |    |    |
| B2-61b-1201       | .....                                                        |    |    |    |    |    |
| B4-70a-1201       | .....T.....                                                  |    |    |    |    |    |
| B4-70b-1201       | .....T.....                                                  |    |    |    |    |    |

|                   |                                                             |    |    |     |     |
|-------------------|-------------------------------------------------------------|----|----|-----|-----|
|                   | 70                                                          | 80 | 90 | 100 | 110 |
| Consensus B preS1 | GAFGPGLTPPHGGILGWSPQAQGLITTVPAAPPPASTNRQSGRQPTPLSPPLRDTHPQA |    |    |     |     |
| B4-2a-1201        | .....I.....I.....T.....                                     |    |    |     |     |
| B4-2b-1201        | .....I.....I.....T.....                                     |    |    |     |     |
| B4-3a-1201        | .....I.....I.....T.....                                     |    |    |     |     |
| B4-3b-1201        | .....I.....I.....T.....                                     |    |    |     |     |
| B4-4a-1201        | .....I.....I.....T.....                                     |    |    |     |     |
| B4-4b-1201        | .....I.....I.....T.....                                     |    |    |     |     |
| B4-5a-1201        | .....I.....I.....T.....H.....                               |    |    |     |     |
| B4-5b-1201        | .....I.....I.....T.....                                     |    |    |     |     |
| B2-16a-1201       | .....I.....                                                 |    |    |     |     |
| B2-16b-2101       | .....I.....                                                 |    |    |     |     |
| B2-17b-1201       | .....I.....                                                 |    |    |     |     |
| B2-18b-1201       | .....I.....                                                 |    |    |     |     |
| B2-19b-1201       | .....T.....I.....                                           |    |    |     |     |
| B2-37b-1201       | .....V.....                                                 |    |    |     |     |
| B4-39a-1201       | .....I.....                                                 |    |    |     |     |

|             |                   |
|-------------|-------------------|
| B4-39b-1201 | .....I.....       |
| B2-41a-1201 | .....I.....I..... |
| B2-41b-1201 | .....I.....I..... |
| B2-42a-1201 | .....I.....I..... |
| B2-42b-1201 | .....I.....I..... |
| B2-43a-1201 | .....I.....I..... |
| B2-43b-1201 | .....I.....I..... |
| B2-60a-1201 | .....             |
| B2-60b-1201 | .....             |
| B2-61a-1201 | .....             |
| B2-61b-1201 | .....             |
| B4-70a-1201 | .....I.....I..... |
| B4-70b-1201 | .....I.....I..... |

|                   |                                                              |    |    |    |    |    |
|-------------------|--------------------------------------------------------------|----|----|----|----|----|
|                   | 10                                                           | 20 | 30 | 40 | 50 | 60 |
| Consensus C preS1 | MGGWSSKPRQGMGTNLSVNPPLGFFPDHQLDPAFGANSNNPDWDFNPNKDHWPEANQVGA |    |    |    |    |    |
| C2-8a-1201        | .....T.....                                                  |    |    |    |    |    |
| C2-8b-1201        | .....                                                        |    |    |    |    |    |
| C1-11a-1201       | .....G.....Q.....A.....V                                     |    |    |    |    |    |
| C1-11b-1201       | .....G.....Q.....A.....V                                     |    |    |    |    |    |
| C1-12b-1201       | .....G.....Q.....A.....V                                     |    |    |    |    |    |
| C1-27b-1201       | .....K.....L.....R.....D.....P.....H.....V                   |    |    |    |    |    |
| C1-31a-1201       | .....L.....R.....Q.....A.....H.....V                         |    |    |    |    |    |
| C1-31b-1201       | .....L.....R.....Q.....A.....H.....V                         |    |    |    |    |    |
| C1-33a-1201       | .....K.....G.....T.....R.....R.....A.....V                   |    |    |    |    |    |
| C1-33b-1201       | .....K.....G.....T.....R.....R.....A.....V                   |    |    |    |    |    |
| C2-50a-1201       | .....                                                        |    |    |    |    |    |
| C2-50b-1201       | .....                                                        |    |    |    |    |    |
| C2-51a-1201       | .....                                                        |    |    |    |    |    |
| C2-51b-1201       | .....                                                        |    |    |    |    |    |
| C2-52a-1201       | .....R.....                                                  |    |    |    |    |    |
| C2-52b-1201       | .....R.....                                                  |    |    |    |    |    |
| C2-53a-1201       | .....R.....                                                  |    |    |    |    |    |
| C2-53b-1201       | .....R.....                                                  |    |    |    |    |    |
| C2-54a-1201       | .....                                                        |    |    |    |    |    |
| C2-54b-1201       | .....                                                        |    |    |    |    |    |
| C2-55a-1201       | .....                                                        |    |    |    |    |    |
| C2-55b-1201       | .....                                                        |    |    |    |    |    |
| C2-56a-1201       | .....                                                        |    |    |    |    |    |
| C2-56b-1156       | .....                                                        |    |    |    |    |    |
| C2-57a-1201       | .....                                                        |    |    |    |    |    |
| C2-57b-1201       | .....                                                        |    |    |    |    |    |
| C2-58b-1201       | .....                                                        |    |    |    |    |    |
| C2-59b-1201       | .....                                                        |    |    |    |    |    |
| C2-62a-1201       | .....                                                        |    |    |    |    |    |
| C2-62b-1156       | .....Q.....A.....H.....V                                     |    |    |    |    |    |
| C1-63a-1201       | .....Q.....A.....H.....V                                     |    |    |    |    |    |
| C2-64a-1201       | .....                                                        |    |    |    |    |    |
| C2-64b-1201       | .....                                                        |    |    |    |    |    |

|                   |                                                             |    |    |     |     |
|-------------------|-------------------------------------------------------------|----|----|-----|-----|
|                   | 70                                                          | 80 | 90 | 100 | 110 |
| Consensus C preS1 | GAFGPGFTPPHGGLLGWSPQAQGITTVPAAPPPASTNRQSGRQPTPISSPPLRDSHPQA |    |    |     |     |
| C2-8a-1201        | .....S.....                                                 |    |    |     |     |
| C2-8b-1201        | .....S.....                                                 |    |    |     |     |
| C1-11a-1201       | .....S.....N.....                                           |    |    |     |     |
| C1-11b-1201       | .....S.....N.....                                           |    |    |     |     |
| C1-12b-1201       | .....S.....N.....                                           |    |    |     |     |

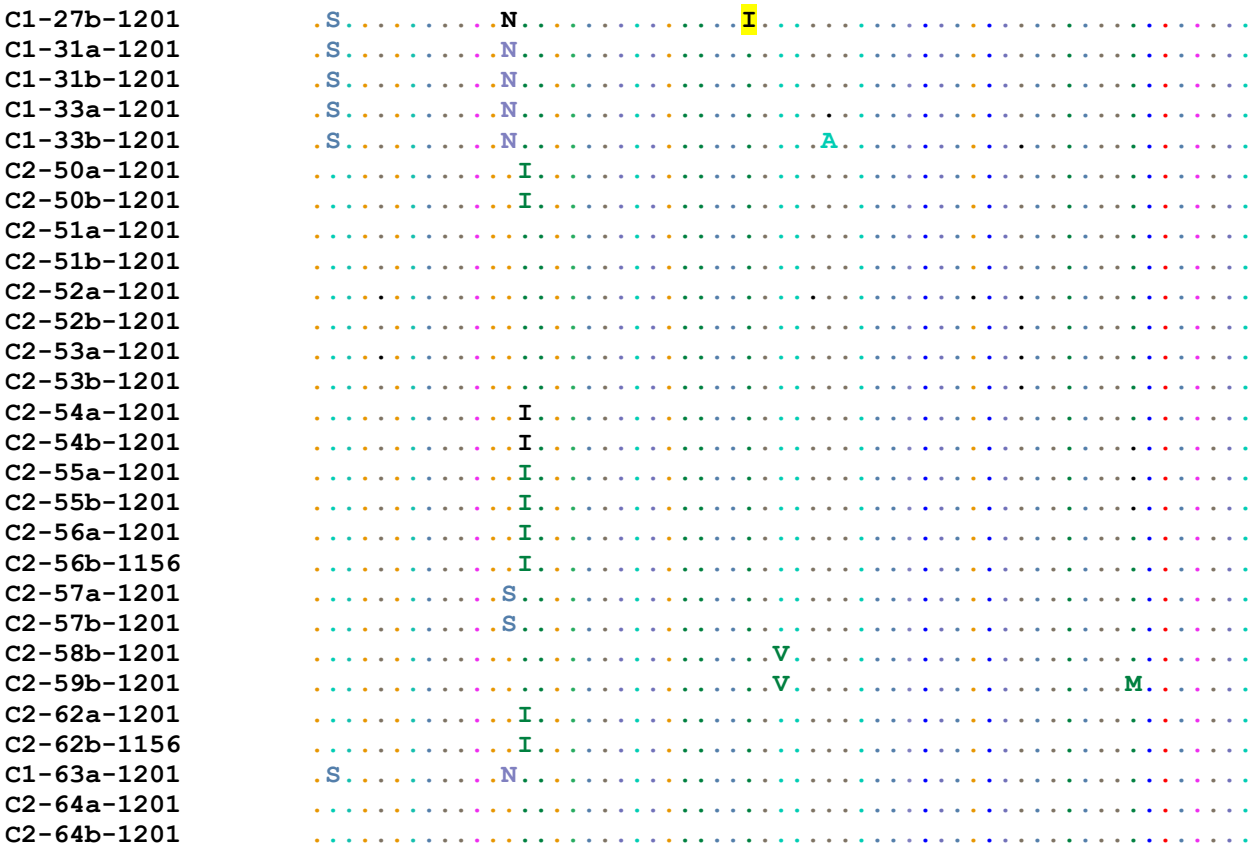

Highlighted: mixture WT/mutant at 50%



|                   | 10                                                                                                            | 20 | 30 | 40 | 50 |   |   |   |   |
|-------------------|---------------------------------------------------------------------------------------------------------------|----|----|----|----|---|---|---|---|
| Consensus A preS2 | M Q W N S T A F H Q A L Q D P R V R G L Y F P A G G S S S G T V N P A P N I A S H I S S I S A R T G D P V T N |    |    |    |    |   |   |   |   |
| A1-46a-1201       | T                                                                                                             | L  | R  | TK | C  | L | V | S | A |
| A1-46b-1201       | T                                                                                                             | L  | R  | TK | C  | L | V | S | A |

|                   | 10                                                                                                            | 20 | 30 | 40 | 50 |
|-------------------|---------------------------------------------------------------------------------------------------------------|----|----|----|----|
| Consensus B preS2 | M Q W N S T T F H Q T L Q D P R V R A L Y F P A G G S S S G T V S P A Q N T V S A I S S I L S K T G D P V P N |    |    |    |    |
| B4-2a-1201        | T                                                                                                             |    |    | A  | TF |
| B4-2b-1201        | T                                                                                                             |    |    | A  | TF |
| B4-3a-1201        | T                                                                                                             |    |    | A  | TF |
| B4-3b-1201        | T                                                                                                             |    |    | A  | TF |
| B4-4a-1201        | T                                                                                                             |    |    | A  | TF |
| B4-4b-1201        | T                                                                                                             | P  |    | A  | TF |
| B4-5a-1201        | T                                                                                                             |    |    | A  | TF |
| B4-5b-1201        | T                                                                                                             |    |    | A  | TF |
| B2-16a-1201       | IR                                                                                                            |    |    |    |    |
| B2-16b-2101       | IR                                                                                                            |    | D  |    |    |
| B2-17b-1201       | IR                                                                                                            |    | D  |    |    |
| B2-18b-1201       | IR                                                                                                            |    |    |    |    |
| B2-19b-1201       |                                                                                                               |    |    |    |    |
| B2-37b-1201       | G                                                                                                             |    |    |    |    |
| B4-39a-1201       |                                                                                                               |    |    | A  | TF |
| B4-39b-1201       |                                                                                                               |    |    | A  | TF |
| B2-41a-1201       |                                                                                                               |    | P  |    |    |
| B2-41b-1201       |                                                                                                               |    | P  |    |    |
| B2-42a-1201       |                                                                                                               |    | P  |    |    |
| B2-42b-1201       |                                                                                                               |    | P  |    |    |
| B2-43a-1201       |                                                                                                               |    | P  |    |    |
| B2-43b-1201       |                                                                                                               |    | P  |    |    |
| B2-60a-1201       |                                                                                                               |    |    |    |    |
| B2-60b-1201       |                                                                                                               |    |    |    |    |
| B2-61a-1201       |                                                                                                               |    |    |    |    |
| B2-61b-1201       |                                                                                                               |    |    |    |    |
| B4-70a-1201       |                                                                                                               |    |    | A  | TF |
| B4-70b-1201       |                                                                                                               |    |    | A  | TF |

Consensus C preS2

10 20 30 40 50

MQWNSTTFHQALLDPRVRGLYFPAGGSSSGTVNPVPTTASPISSIFSRTGDPAPN

C2-8a-1201

C2-8b-1201

C1-11a-1201

C1-11b-1201

C1-12b-1201

C1-27b-1201

C1-31a-1201

C1-31b-1201

C1-33a-1201

C1-33b-1201

C2-50a-1201

C2-50b-1201

C2-51a-1201

C2-51b-1201

C2-52a-1201

C2-52b-1201

C2-53a-1201

C2-53b-1201

C2-54a-1201

C2-54b-1201

C2-55a-1201

C2-55b-1201

C2-56a-1201

C2-56b-1156

C2-57a-1201

C2-57b-1201

C2-58b-1201

C2-59b-1201

C2-62a-1201

C2-62b-1156

C1-63a-1201

C2-64a-1201

C2-64b-1201

S

S

S

S

S

S

S

S

S

S

K

PK

PK

QNL

QNL

I

I

G

I

I

SK

P

K



|               | 70                                                           | 80 | 90 | 100 | 110 | 120 |
|---------------|--------------------------------------------------------------|----|----|-----|-----|-----|
| Consensus B S | SPTCCPPICPGYRWMCLRRFIIFLCIILLCLIFLLVLLDYQGLPVCPILIPGSSTTSTGP |    |    |     |     |     |
| B4-2a-1201    | .....W.....                                                  |    |    |     |     |     |
| B4-2b-1201    | Y.....W.....                                                 |    |    |     |     |     |
| B4-3a-1201    | .....S.....                                                  |    |    |     |     |     |
| B4-3b-1201    | .....S.....                                                  |    |    |     |     |     |
| B4-4a-1201    | Y.....W.....                                                 |    |    |     |     |     |
| B4-4b-1201    | Y.....W.....                                                 |    |    |     |     |     |
| B4-5a-1201    | Y.....W.....                                                 |    |    |     |     |     |
| B4-5b-1201    | .....W.....                                                  |    |    |     |     |     |
| B2-16a-1201   |                                                              |    |    |     |     |     |
| B2-16b-2101   |                                                              |    |    |     |     |     |
| B2-17b-1201   |                                                              |    |    |     |     |     |
| B2-18b-1201   |                                                              |    |    |     |     |     |
| B2-19b-1201   | .....F.....                                                  |    |    |     |     |     |
| B2-37b-1201   |                                                              |    |    |     |     |     |
| B4-39a-1201   | L.....                                                       |    |    |     |     |     |
| B4-39b-1201   |                                                              |    |    |     |     |     |
| B2-41a-1201   |                                                              |    |    |     |     |     |
| B2-41b-1201   |                                                              |    |    |     |     |     |
| B2-42a-1201   |                                                              |    |    |     |     |     |
| B2-42b-1201   |                                                              |    |    |     |     |     |
| B2-43a-1201   | .....A.....                                                  |    |    |     |     |     |
| B2-43b-1201   | .....A.....                                                  |    |    |     |     |     |
| B2-60a-1201   |                                                              |    |    |     |     |     |
| B2-60b-1201   |                                                              |    |    |     |     |     |
| B2-61a-1201   |                                                              |    |    |     |     |     |
| B2-61b-1201   |                                                              |    |    |     |     |     |
| B4-70a-1201   |                                                              |    |    |     |     |     |
| B4-70b-1201   |                                                              |    |    |     |     |     |

|               | 130                                                          | 140 | 150 | 160 | 170 | 180 |
|---------------|--------------------------------------------------------------|-----|-----|-----|-----|-----|
| Consensus B S | CKTCTTPAQGTSMFPSCCCTKPTDGNCTCIPIPSSWAFACYLWEWASVRFSWLSLLVPFV |     |     |     |     |     |
| B4-2a-1201    | R.....F.....                                                 |     |     |     |     |     |
| B4-2b-1201    | R.....F.....                                                 |     |     |     |     |     |
| B4-3a-1201    | R.....S.F.....                                               |     |     |     |     |     |
| B4-3b-1201    | R.....S.F.....                                               |     |     |     |     |     |
| B4-4a-1201    | R.....F.....                                                 |     |     |     |     |     |
| B4-4b-1201    | R.....F.....G.....                                           |     |     |     |     |     |
| B4-5a-1201    | R.....F.....                                                 |     |     |     |     |     |
| B4-5b-1201    | R.....F.....                                                 |     |     |     |     |     |
| B2-16a-1201   | .....L.....F.....                                            |     |     |     |     |     |
| B2-16b-2101   | .....L.....F.....                                            |     |     |     |     |     |
| B2-17b-1201   | .....L.....F.....                                            |     |     |     |     |     |
| B2-18b-1201   | .....F.....                                                  |     |     |     |     |     |
| B2-19b-1201   | .....F.....                                                  |     |     |     |     |     |
| B2-37b-1201   | .....A.....F.....                                            |     |     |     |     |     |
| B4-39a-1201   | R.....                                                       |     |     |     |     |     |
| B4-39b-1201   | R.....                                                       |     |     |     |     |     |
| B2-41a-1201   |                                                              |     |     |     |     |     |
| B2-41b-1201   |                                                              |     |     |     |     |     |
| B2-42a-1201   |                                                              |     |     |     |     |     |
| B2-42b-1201   |                                                              |     |     |     |     |     |
| B2-43a-1201   |                                                              |     |     |     |     |     |
| B2-43b-1201   |                                                              |     |     |     |     |     |
| B2-60a-1201   |                                                              |     |     |     |     |     |
| B2-60b-1201   |                                                              |     |     |     |     |     |
| B2-61a-1201   |                                                              |     |     |     |     |     |
| B2-61b-1201   |                                                              |     |     |     |     |     |
| B4-70a-1201   | R.....                                                       |     |     |     |     |     |

|             |         |  |  |  |  |  |  |  |  |  |  |  |  |  |  |  |  |  |  |  |  |  |  |  |  |  |  |  |  |  |  |  |  |  |  |  |  |  |  |  |  |  |  |  |  |  |  |  |  |  |  |  |  |  |  |  |  |  |  |  |  |  |  |  |  |  |  |  |  |  |  |  |  |  |  |  |  |  |  |  |  |  |  |  |  |  |  |  |  |  |  |  |  |  |  |  |  |  |  |  |  |  |  |  |  |  |  |  |  |  |  |  |  |  |  |  |  |  |  |  |  |  |  |  |  |  |  |  |  |  |  |  |  |  |  |  |  |  |  |  |  |  |  |  |  |  |  |  |  |  |  |  |  |  |  |  |  |  |  |  |  |  |  |  |  |  |  |  |  |  |  |  |  |  |  |  |  |  |  |  |  |  |  |  |  |  |  |  |  |  |  |  |  |  |  |  |  |  |  |  |  |  |  |  |  |  |  |  |  |  |  |  |  |  |  |  |  |  |  |  |  |  |  |  |  |  |  |  |  |  |  |  |  |  |  |  |  |  |  |  |  |  |  |  |  |  |  |  |  |  |  |  |  |  |  |  |  |  |  |  |  |  |  |  |  |  |  |  |  |  |  |  |  |  |  |  |  |  |  |  |  |  |  |  |  |  |  |  |  |  |  |  |  |  |  |  |  |  |  |  |  |  |  |  |  |  |  |  |  |  |  |  |  |  |  |  |  |  |  |  |  |  |  |  |  |  |  |  |  |  |  |  |  |  |  |  |  |  |  |  |  |  |  |  |  |  |  |  |  |  |  |  |  |  |  |  |  |  |  |  |  |  |  |  |  |  |  |  |  |  |  |  |  |  |  |  |  |  |  |  |  |  |  |  |  |  |  |  |  |  |  |  |  |  |  |  |  |  |  |  |  |  |  |  |  |  |  |  |  |  |  |  |  |  |  |  |  |  |  |  |  |  |  |  |  |  |  |  |  |  |  |  |  |  |  |  |  |  |  |  |  |  |  |  |  |  |  |  |  |  |  |  |  |  |  |  |  |  |  |  |  |  |  |  |  |  |  |  |  |  |  |  |  |  |  |  |  |  |  |  |  |  |  |  |  |  |  |  |  |  |  |  |  |  |  |  |  |  |  |  |  |  |  |  |  |  |  |  |  |  |  |  |  |  |  |  |  |  |  |  |  |  |  |  |  |  |  |  |  |  |  |  |  |  |  |  |  |  |  |  |  |  |  |  |  |  |  |  |  |  |  |  |  |  |  |  |  |  |  |  |  |  |  |  |  |  |  |  |  |  |  |  |  |  |  |  |  |  |  |  |  |  |  |  |  |  |  |  |  |  |  |  |  |  |  |  |  |  |  |  |  |  |  |  |  |  |  |  |  |  |  |  |  |  |  |  |  |  |  |  |  |  |  |  |  |  |  |  |  |  |  |  |  |  |  |  |  |  |  |  |  |  |  |  |  |  |  |  |  |  |  |  |  |  |  |  |  |  |  |  |  |  |  |  |  |  |  |  |  |  |  |  |  |  |  |  |  |  |  |  |  |  |  |  |  |  |  |  |  |  |  |  |  |  |  |  |  |  |  |  |  |  |  |  |  |  |  |  |  |  |  |  |  |  |  |  |  |  |  |  |  |  |  |  |  |  |  |  |  |  |  |  |  |  |  |  |  |  |  |  |  |  |  |  |  |  |  |  |  |  |  |  |  |  |  |  |  |  |  |  |  |  |  |  |  |  |  |  |  |  |  |  |  |  |  |  |  |  |  |  |  |  |  |  |  |  |  |  |  |  |  |  |  |  |  |  |  |  |  |  |  |  |  |  |  |  |  |  |  |  |  |  |  |  |  |  |  |  |  |  |  |  |  |  |  |  |  |  |  |  |  |  |  |  |  |  |  |  |  |  |  |  |  |  |  |  |  |  |  |  |  |  |  |  |  |  |  |  |  |  |  |  |  |  |  |  |  |  |  |  |  |  |  |  |  |  |  |  |  |  |  |  |  |  |  |  |  |  |  |  |  |  |  |  |  |  |  |  |  |  |  |  |  |  |  |  |  |  |  |  |  |  |  |  |  |  |  |  |  |  |  |  |  |  |  |  |  |  |  |  |  |  |  |  |  |  |  |  |  |  |  |  |  |  |  |  |  |  |  |  |  |  |  |  |  |  |  |  |  |  |  |  |  |  |  |  |  |  |  |  |  |  |  |  |  |  |  |  |  |  |  |  |  |  |  |  |  |  |  |  |  |  |  |  |  |  |  |  |  |  |  |  |  |  |  |  |  |  |  |  |  |  |  |  |  |  |  |  |  |  |  |  |  |  |  |  |  |  |  |  |  |  |  |  |  |  |  |  |  |  |  |  |  |  |  |  |  |  |  |  |  |  |  |  |  |  |  |  |  |  |  |  |  |  |  |  |  |  |  |  |  |  |  |  |  |  |  |  |  |  |  |  |  |  |  |  |  |  |  |  |  |  |  |  |  |  |  |  |  |  |  |  |  |  |  |  |  |  |  |  |  |  |  |  |  |  |  |  |  |  |  |  |  |  |  |  |  |  |  |  |  |  |  |  |  |  |  |  |  |  |  |  |  |  |  |  |  |  |  |  |  |  |  |  |  |  |  |  |  |  |  |  |  |  |  |  |  |  |  |  |  |  |  |  |  |  |  |  |  |  |  |  |  |  |  |  |  |  |  |  |  |  |  |  |  |  |  |  |  |  |  |  |  |  |  |  |  |  |  |  |  |  |  |  |  |  |  |  |  |  |  |  |  |  |  |  |  |  |  |  |  |  |  |  |  |  |  |  |  |  |  |  |  |  |  |  |  |  |  |  |  |  |  |  |  |  |  |  |  |  |  |  |  |  |  |  |  |  |  |  |  |  |  |  |  |  |  |  |  |  |  |  |  |  |  |  |  |  |  |  |  |  |  |  |  |  |  |  |  |  |  |  |  |  |  |  |  |  |  |  |  |  |  |  |  |  |  |  |  |  |  |  |  |  |  |  |  |  |  |  |  |  |  |  |  |  |  |  |  |  |  |  |  |  |  |  |  |  |  |  |  |  |  |  |  |  |  |  |  |  |  |  |  |  |  |  |  |  |  |  |  |  |  |  |  |  |  |  |  |  |  |  |  |  |  |  |  |  |  |  |  |  |  |  |  |  |  |  |  |  |  |  |  |  |  |  |  |  |  |    |
|-------------|---------|--|--|--|--|--|--|--|--|--|--|--|--|--|--|--|--|--|--|--|--|--|--|--|--|--|--|--|--|--|--|--|--|--|--|--|--|--|--|--|--|--|--|--|--|--|--|--|--|--|--|--|--|--|--|--|--|--|--|--|--|--|--|--|--|--|--|--|--|--|--|--|--|--|--|--|--|--|--|--|--|--|--|--|--|--|--|--|--|--|--|--|--|--|--|--|--|--|--|--|--|--|--|--|--|--|--|--|--|--|--|--|--|--|--|--|--|--|--|--|--|--|--|--|--|--|--|--|--|--|--|--|--|--|--|--|--|--|--|--|--|--|--|--|--|--|--|--|--|--|--|--|--|--|--|--|--|--|--|--|--|--|--|--|--|--|--|--|--|--|--|--|--|--|--|--|--|--|--|--|--|--|--|--|--|--|--|--|--|--|--|--|--|--|--|--|--|--|--|--|--|--|--|--|--|--|--|--|--|--|--|--|--|--|--|--|--|--|--|--|--|--|--|--|--|--|--|--|--|--|--|--|--|--|--|--|--|--|--|--|--|--|--|--|--|--|--|--|--|--|--|--|--|--|--|--|--|--|--|--|--|--|--|--|--|--|--|--|--|--|--|--|--|--|--|--|--|--|--|--|--|--|--|--|--|--|--|--|--|--|--|--|--|--|--|--|--|--|--|--|--|--|--|--|--|--|--|--|--|--|--|--|--|--|--|--|--|--|--|--|--|--|--|--|--|--|--|--|--|--|--|--|--|--|--|--|--|--|--|--|--|--|--|--|--|--|--|--|--|--|--|--|--|--|--|--|--|--|--|--|--|--|--|--|--|--|--|--|--|--|--|--|--|--|--|--|--|--|--|--|--|--|--|--|--|--|--|--|--|--|--|--|--|--|--|--|--|--|--|--|--|--|--|--|--|--|--|--|--|--|--|--|--|--|--|--|--|--|--|--|--|--|--|--|--|--|--|--|--|--|--|--|--|--|--|--|--|--|--|--|--|--|--|--|--|--|--|--|--|--|--|--|--|--|--|--|--|--|--|--|--|--|--|--|--|--|--|--|--|--|--|--|--|--|--|--|--|--|--|--|--|--|--|--|--|--|--|--|--|--|--|--|--|--|--|--|--|--|--|--|--|--|--|--|--|--|--|--|--|--|--|--|--|--|--|--|--|--|--|--|--|--|--|--|--|--|--|--|--|--|--|--|--|--|--|--|--|--|--|--|--|--|--|--|--|--|--|--|--|--|--|--|--|--|--|--|--|--|--|--|--|--|--|--|--|--|--|--|--|--|--|--|--|--|--|--|--|--|--|--|--|--|--|--|--|--|--|--|--|--|--|--|--|--|--|--|--|--|--|--|--|--|--|--|--|--|--|--|--|--|--|--|--|--|--|--|--|--|--|--|--|--|--|--|--|--|--|--|--|--|--|--|--|--|--|--|--|--|--|--|--|--|--|--|--|--|--|--|--|--|--|--|--|--|--|--|--|--|--|--|--|--|--|--|--|--|--|--|--|--|--|--|--|--|--|--|--|--|--|--|--|--|--|--|--|--|--|--|--|--|--|--|--|--|--|--|--|--|--|--|--|--|--|--|--|--|--|--|--|--|--|--|--|--|--|--|--|--|--|--|--|--|--|--|--|--|--|--|--|--|--|--|--|--|--|--|--|--|--|--|--|--|--|--|--|--|--|--|--|--|--|--|--|--|--|--|--|--|--|--|--|--|--|--|--|--|--|--|--|--|--|--|--|--|--|--|--|--|--|--|--|--|--|--|--|--|--|--|--|--|--|--|--|--|--|--|--|--|--|--|--|--|--|--|--|--|--|--|--|--|--|--|--|--|--|--|--|--|--|--|--|--|--|--|--|--|--|--|--|--|--|--|--|--|--|--|--|--|--|--|--|--|--|--|--|--|--|--|--|--|--|--|--|--|--|--|--|--|--|--|--|--|--|--|--|--|--|--|--|--|--|--|--|--|--|--|--|--|--|--|--|--|--|--|--|--|--|--|--|--|--|--|--|--|--|--|--|--|--|--|--|--|--|--|--|--|--|--|--|--|--|--|--|--|--|--|--|--|--|--|--|--|--|--|--|--|--|--|--|--|--|--|--|--|--|--|--|--|--|--|--|--|--|--|--|--|--|--|--|--|--|--|--|--|--|--|--|--|--|--|--|--|--|--|--|--|--|--|--|--|--|--|--|--|--|--|--|--|--|--|--|--|--|--|--|--|--|--|--|--|--|--|--|--|--|--|--|--|--|--|--|--|--|--|--|--|--|--|--|--|--|--|--|--|--|--|--|--|--|--|--|--|--|--|--|--|--|--|--|--|--|--|--|--|--|--|--|--|--|--|--|--|--|--|--|--|--|--|--|--|--|--|--|--|--|--|--|--|--|--|--|--|--|--|--|--|--|--|--|--|--|--|--|--|--|--|--|--|--|--|--|--|--|--|--|--|--|--|--|--|--|--|--|--|--|--|--|--|--|--|--|--|--|--|--|--|--|--|--|--|--|--|--|--|--|--|--|--|--|--|--|--|--|--|--|--|--|--|--|--|--|--|--|--|--|--|--|--|--|--|--|--|--|--|--|--|--|--|--|--|--|--|--|--|--|--|--|--|--|--|--|--|--|--|--|--|--|--|--|--|--|--|--|--|--|--|--|--|--|--|--|--|--|--|--|--|--|--|--|--|--|--|--|--|--|--|--|--|--|--|--|--|--|--|--|--|--|--|--|--|--|--|--|--|--|--|--|--|--|--|--|--|--|--|--|--|--|--|--|--|--|--|--|--|--|--|--|--|--|--|--|--|--|--|--|--|--|--|--|--|--|--|--|--|--|--|--|--|--|--|--|--|--|--|--|--|--|--|--|--|--|--|--|--|--|--|--|--|--|--|--|--|--|--|--|--|--|--|--|--|--|--|--|--|--|--|--|--|--|--|--|--|--|--|--|--|--|--|--|--|--|--|--|--|--|--|--|--|--|--|--|--|--|--|--|--|--|--|--|--|--|--|--|--|--|--|--|--|--|--|--|--|--|--|--|--|--|--|--|--|--|--|--|--|--|--|--|--|--|--|--|--|--|--|--|--|--|--|--|--|--|--|--|--|--|--|--|--|--|--|--|--|--|--|--|--|--|--|--|--|--|--|--|--|--|--|--|--|--|--|--|--|--|--|--|--|--|--|--|----|
| B4-70b-1201 | .R..... |  |  |  |  |  |  |  |  |  |  |  |  |  |  |  |  |  |  |  |  |  |  |  |  |  |  |  |  |  |  |  |  |  |  |  |  |  |  |  |  |  |  |  |  |  |  |  |  |  |  |  |  |  |  |  |  |  |  |  |  |  |  |  |  |  |  |  |  |  |  |  |  |  |  |  |  |  |  |  |  |  |  |  |  |  |  |  |  |  |  |  |  |  |  |  |  |  |  |  |  |  |  |  |  |  |  |  |  |  |  |  |  |  |  |  |  |  |  |  |  |  |  |  |  |  |  |  |  |  |  |  |  |  |  |  |  |  |  |  |  |  |  |  |  |  |  |  |  |  |  |  |  |  |  |  |  |  |  |  |  |  |  |  |  |  |  |  |  |  |  |  |  |  |  |  |  |  |  |  |  |  |  |  |  |  |  |  |  |  |  |  |  |  |  |  |  |  |  |  |  |  |  |  |  |  |  |  |  |  |  |  |  |  |  |  |  |  |  |  |  |  |  |  |  |  |  |  |  |  |  |  |  |  |  |  |  |  |  |  |  |  |  |  |  |  |  |  |  |  |  |  |  |  |  |  |  |  |  |  |  |  |  |  |  |  |  |  |  |  |  |  |  |  |  |  |  |  |  |  |  |  |  |  |  |  |  |  |  |  |  |  |  |  |  |  |  |  |  |  |  |  |  |  |  |  |  |  |  |  |  |  |  |  |  |  |  |  |  |  |  |  |  |  |  |  |  |  |  |  |  |  |  |  |  |  |  |  |  |  |  |  |  |  |  |  |  |  |  |  |  |  |  |  |  |  |  |  |  |  |  |  |  |  |  |  |  |  |  |  |  |  |  |  |  |  |  |  |  |  |  |  |  |  |  |  |  |  |  |  |  |  |  |  |  |  |  |  |  |  |  |  |  |  |  |  |  |  |  |  |  |  |  |  |  |  |  |  |  |  |  |  |  |  |  |  |  |  |  |  |  |  |  |  |  |  |  |  |  |  |  |  |  |  |  |  |  |  |  |  |  |  |  |  |  |  |  |  |  |  |  |  |  |  |  |  |  |  |  |  |  |  |  |  |  |  |  |  |  |  |  |  |  |  |  |  |  |  |  |  |  |  |  |  |  |  |  |  |  |  |  |  |  |  |  |  |  |  |  |  |  |  |  |  |  |  |  |  |  |  |  |  |  |  |  |  |  |  |  |  |  |  |  |  |  |  |  |  |  |  |  |  |  |  |  |  |  |  |  |  |  |  |  |  |  |  |  |  |  |  |  |  |  |  |  |  |  |  |  |  |  |  |  |  |  |  |  |  |  |  |  |  |  |  |  |  |  |  |  |  |  |  |  |  |  |  |  |  |  |  |  |  |  |  |  |  |  |  |  |  |  |  |  |  |  |  |  |  |  |  |  |  |  |  |  |  |  |  |  |  |  |  |  |  |  |  |  |  |  |  |  |  |  |  |  |  |  |  |  |  |  |  |  |  |  |  |  |  |  |  |  |  |  |  |  |  |  |  |  |  |  |  |  |  |  |  |  |  |  |  |  |  |  |  |  |  |  |  |  |  |  |  |  |  |  |  |  |  |  |  |  |  |  |  |  |  |  |  |  |  |  |  |  |  |  |  |  |  |  |  |  |  |  |  |  |  |  |  |  |  |  |  |  |  |  |  |  |  |  |  |  |  |  |  |  |  |  |  |  |  |  |  |  |  |  |  |  |  |  |  |  |  |  |  |  |  |  |  |  |  |  |  |  |  |  |  |  |  |  |  |  |  |  |  |  |  |  |  |  |  |  |  |  |  |  |  |  |  |  |  |  |  |  |  |  |  |  |  |  |  |  |  |  |  |  |  |  |  |  |  |  |  |  |  |  |  |  |  |  |  |  |  |  |  |  |  |  |  |  |  |  |  |  |  |  |  |  |  |  |  |  |  |  |  |  |  |  |  |  |  |  |  |  |  |  |  |  |  |  |  |  |  |  |  |  |  |  |  |  |  |  |  |  |  |  |  |  |  |  |  |  |  |  |  |  |  |  |  |  |  |  |  |  |  |  |  |  |  |  |  |  |  |  |  |  |  |  |  |  |  |  |  |  |  |  |  |  |  |  |  |  |  |  |  |  |  |  |  |  |  |  |  |  |  |  |  |  |  |  |  |  |  |  |  |  |  |  |  |  |  |  |  |  |  |  |  |  |  |  |  |  |  |  |  |  |  |  |  |  |  |  |  |  |  |  |  |  |  |  |  |  |  |  |  |  |  |  |  |  |  |  |  |  |  |  |  |  |  |  |  |  |  |  |  |  |  |  |  |  |  |  |  |  |  |  |  |  |  |  |  |  |  |  |  |  |  |  |  |  |  |  |  |  |  |  |  |  |  |  |  |  |  |  |  |  |  |  |  |  |  |  |  |  |  |  |  |  |  |  |  |  |  |  |  |  |  |  |  |  |  |  |  |  |  |  |  |  |  |  |  |  |  |  |  |  |  |  |  |  |  |  |  |  |  |  |  |  |  |  |  |  |  |  |  |  |  |  |  |  |  |  |  |  |  |  |  |  |  |  |  |  |  |  |  |  |  |  |  |  |  |  |  |  |  |  |  |  |  |  |  |  |  |  |  |  |  |  |  |  |  |  |  |  |  |  |  |  |  |  |  |  |  |  |  |  |  |  |  |  |  |  |  |  |  |  |  |  |  |  |  |  |  |  |  |  |  |  |  |  |  |  |  |  |  |  |  |  |  |  |  |  |  |  |  |  |  |  |  |  |  |  |  |  |  |  |  |  |  |  |  |  |  |  |  |  |  |  |  |  |  |  |  |  |  |  |  |  |  |  |  |  |  |  |  |  |  |  |  |  |  |  |  |  |  |  |  |  |  |  |  |  |  |  |  |  |  |  |  |  |  |  |  |  |  |  |  |  |  |  |  |  |  |  |  |  |  |  |  |  |  |  |  |  |  |  |  |  |  |  |  |  |  |  |  |  |  |  |  |  |  |  |  |  |  |  |  |  |  |  |  |  |  |  |  |  |  |  |  |  |  |  |  |  |  |  |  |  |  |  |  |  |  |  |  |  |  |  |  |  |  |  |  |  |  |  |  |  |  |  |  |  |  |  |  |  |  |  |  |  |  |  |  |  |  |  |  |  |  |  |  |  |  |  |  |  |  |  |  |  |  |  |  |  |  |  |  |  |  |  |    |
|             |         |  |  |  |  |  |  |  |  |  |  |  |  |  |  |  |  |  |  |  |  |  |  |  |  |  |  |  |  |  |  |  |  |  |  |  |  |  |  |  |  |  |  |  |  |  |  |  |  |  |  |  |  |  |  |  |  |  |  |  |  |  |  |  |  |  |  |  |  |  |  |  |  |  |  |  |  |  |  |  |  |  |  |  |  |  |  |  |  |  |  |  |  |  |  |  |  |  |  |  |  |  |  |  |  |  |  |  |  |  |  |  |  |  |  |  |  |  |  |  |  |  |  |  |  |  |  |  |  |  |  |  |  |  |  |  |  |  |  |  |  |  |  |  |  |  |  |  |  |  |  |  |  |  |  |  |  |  |  |  |  |  |  |  |  |  |  |  |  |  |  |  |  |  |  |  |  |  |  |  |  |  |  |  |  |  |  |  |  |  |  |  |  |  |  |  |  |  |  |  |  |  |  |  |  |  |  |  |  |  |  |  |  |  |  |  |  |  |  |  |  |  |  |  |  |  |  |  |  |  |  |  |  |  |  |  |  |  |  |  |  |  |  |  |  |  |  |  |  |  |  |  |  |  |  |  |  |  |  |  |  |  |  |  |  |  |  |  |  |  |  |  |  |  |  |  |  |  |  |  |  |  |  |  |  |  |  |  |  |  |  |  |  |  |  |  |  |  |  |  |  |  |  |  |  |  |  |  |  |  |  |  |  |  |  |  |  |  |  |  |  |  |  |  |  |  |  |  |  |  |  |  |  |  |  |  |  |  |  |  |  |  |  |  |  |  |  |  |  |  |  |  |  |  |  |  |  |  |  |  |  |  |  |  |  |  |  |  |  |  |  |  |  |  |  |  |  |  |  |  |  |  |  |  |  |  |  |  |  |  |  |  |  |  |  |  |  |  |  |  |  |  |  |  |  |  |  |  |  |  |  |  |  |  |  |  |  |  |  |  |  |  |  |  |  |  |  |  |  |  |  |  |  |  |  |  |  |  |  |  |  |  |  |  |  |  |  |  |  |  |  |  |  |  |  |  |  |  |  |  |  |  |  |  |  |  |  |  |  |  |  |  |  |  |  |  |  |  |  |  |  |  |  |  |  |  |  |  |  |  |  |  |  |  |  |  |  |  |  |  |  |  |  |  |  |  |  |  |  |  |  |  |  |  |  |  |  |  |  |  |  |  |  |  |  |  |  |  |  |  |  |  |  |  |  |  |  |  |  |  |  |  |  |  |  |  |  |  |  |  |  |  |  |  |  |  |  |  |  |  |  |  |  |  |  |  |  |  |  |  |  |  |  |  |  |  |  |  |  |  |  |  |  |  |  |  |  |  |  |  |  |  |  |  |  |  |  |  |  |  |  |  |  |  |  |  |  |  |  |  |  |  |  |  |  |  |  |  |  |  |  |  |  |  |  |  |  |  |  |  |  |  |  |  |  |  |  |  |  |  |  |  |  |  |  |  |  |  |  |  |  |  |  |  |  |  |  |  |  |  |  |  |  |  |  |  |  |  |  |  |  |  |  |  |  |  |  |  |  |  |  |  |  |  |  |  |  |  |  |  |  |  |  |  |  |  |  |  |  |  |  |  |  |  |  |  |  |  |  |  |  |  |  |  |  |  |  |  |  |  |  |  |  |  |  |  |  |  |  |  |  |  |  |  |  |  |  |  |  |  |  |  |  |  |  |  |  |  |  |  |  |  |  |  |  |  |  |  |  |  |  |  |  |  |  |  |  |  |  |  |  |  |  |  |  |  |  |  |  |  |  |  |  |  |  |  |  |  |  |  |  |  |  |  |  |  |  |  |  |  |  |  |  |  |  |  |  |  |  |  |  |  |  |  |  |  |  |  |  |  |  |  |  |  |  |  |  |  |  |  |  |  |  |  |  |  |  |  |  |  |  |  |  |  |  |  |  |  |  |  |  |  |  |  |  |  |  |  |  |  |  |  |  |  |  |  |  |  |  |  |  |  |  |  |  |  |  |  |  |  |  |  |  |  |  |  |  |  |  |  |  |  |  |  |  |  |  |  |  |  |  |  |  |  |  |  |  |  |  |  |  |  |  |  |  |  |  |  |  |  |  |  |  |  |  |  |  |  |  |  |  |  |  |  |  |  |  |  |  |  |  |  |  |  |  |  |  |  |  |  |  |  |  |  |  |  |  |  |  |  |  |  |  |  |  |  |  |  |  |  |  |  |  |  |  |  |  |  |  |  |  |  |  |  |  |  |  |  |  |  |  |  |  |  |  |  |  |  |  |  |  |  |  |  |  |  |  |  |  |  |  |  |  |  |  |  |  |  |  |  |  |  |  |  |  |  |  |  |  |  |  |  |  |  |  |  |  |  |  |  |  |  |  |  |  |  |  |  |  |  |  |  |  |  |  |  |  |  |  |  |  |  |  |  |  |  |  |  |  |  |  |  |  |  |  |  |  |  |  |  |  |  |  |  |  |  |  |  |  |  |  |  |  |  |  |  |  |  |  |  |  |  |  |  |  |  |  |  |  |  |  |  |  |  |  |  |  |  |  |  |  |  |  |  |  |  |  |  |  |  |  |  |  |  |  |  |  |  |  |  |  |  |  |  |  |  |  |  |  |  |  |  |  |  |  |  |  |  |  |  |  |  |  |  |  |  |  |  |  |  |  |  |  |  |  |  |  |  |  |  |  |  |  |  |  |  |  |  |  |  |  |  |  |  |  |  |  |  |  |  |  |  |  |  |  |  |  |  |  |  |  |  |  |  |  |  |  |  |  |  |  |  |  |  |  |  |  |  |  |  |  |  |  |  |  |  |  |  |  |  |  |  |  |  |  |  |  |  |  |  |  |  |  |  |  |  |  |  |  |  |  |  |  |  |  |  |  |  |  |  |  |  |  |  |  |  |  |  |  |  |  |  |  |  |  |  |  |  |  |  |  |  |  |  |  |  |  |  |  |  |  |  |  |  |  |  |  |  |  |  |  |  |  |  |  |  |  |  |  |  |  |  |  |  |  |  |  |  |  |  |  |  |  |  |  |  |  |  |  |  |  |  |  |  |  |  |  |  |  |  |  |  |  |  |  |  |  |  |  |  |  |  |  |  |  |  |  |  |  |  |  |  |  |  |  |  |  |  |  |  |  |  |  |  |  |  |  |  |  |  |  |  |  |  |  |  |  |  |  |  |  |  |  |  |  |  |  |  |  | </ |

Highlighted: mixture WT/mutant at 50%

|                    | 10                                                                                                                      | 20 | 30 | 40 | 50 | 60 |
|--------------------|-------------------------------------------------------------------------------------------------------------------------|----|----|----|----|----|
| Consensus C S-gene | M E N T T S G F L G P L L V L Q A G F F L I T R I L T I P Q S L D S W W T S L N F L G G A P T C P G Q N S Q S P T S N H |    |    |    |    |    |
| C2-8a-1201         | .....M.....                                                                                                             |    |    |    |    |    |
| C2-8b-1201         | .....                                                                                                                   |    |    |    |    |    |
| C1-11a-1201        | .....V.....H..L.N.....I..                                                                                               |    |    |    |    |    |
| C1-11b-1201        | ..S.....                                                                                                                |    |    |    |    |    |
| C1-12b-1201        | ..S.....G..V.....                                                                                                       |    |    |    |    |    |
| C1-27b-1201        | ..S.....                                                                                                                |    |    |    |    |    |
| C1-31a-1201        | ..S.....                                                                                                                |    |    |    |    |    |
| C1-31b-1201        | ..S.....                                                                                                                |    |    |    |    |    |
| C1-33a-1201        | ..S.....K.....                                                                                                          |    |    |    |    |    |
| C1-33b-1201        | ..S.....K.....                                                                                                          |    |    |    |    |    |
| C2-50a-1201        | .....                                                                                                                   |    |    |    |    |    |
| C2-50b-1201        | .....                                                                                                                   |    |    |    |    |    |
| C2-51a-1201        | T.....H.....S.....                                                                                                      |    |    |    |    |    |
| C2-51b-1201        | T.....H.....S.....                                                                                                      |    |    |    |    |    |
| C2-52a-1201        | ..S.....S..E.LK..                                                                                                       |    |    |    |    |    |
| C2-52b-1201        | ..S.....S..E.LK..                                                                                                       |    |    |    |    |    |
| C2-53a-1201        | ..S.....S..E.LK..                                                                                                       |    |    |    |    |    |
| C2-53b-1201        | ..S.....S..E.LK..                                                                                                       |    |    |    |    |    |
| C2-54a-1201        | .....                                                                                                                   |    |    |    |    |    |
| C2-54b-1201        | .....                                                                                                                   |    |    |    |    |    |
| C2-55a-1201        | .....                                                                                                                   |    |    |    |    |    |
| C2-55b-1201        | .....                                                                                                                   |    |    |    |    |    |
| C2-56a-1201        | .....                                                                                                                   |    |    |    |    |    |
| C2-56b-1156        | .....                                                                                                                   |    |    |    |    |    |
| C2-57a-1201        | .....                                                                                                                   |    |    |    |    |    |
| C2-57b-1201        | .....                                                                                                                   |    |    |    |    |    |
| C2-58b-1201        | .....A.....                                                                                                             |    |    |    |    |    |
| C2-59b-1201        | .....                                                                                                                   |    |    |    |    |    |
| C2-62a-1201        | .....                                                                                                                   |    |    |    |    |    |
| C2-62b-1156        | .....                                                                                                                   |    |    |    |    |    |
| C1-63a-1201        | .....K.....L..L..                                                                                                       |    |    |    |    |    |
| C2-64a-1201        | .....ET.....                                                                                                            |    |    |    |    |    |
| C2-64b-1201        | .....ET.....                                                                                                            |    |    |    |    |    |

|                    | 70                                                                                                                    | 80 | 90 | 100 | 110 | 120 |
|--------------------|-----------------------------------------------------------------------------------------------------------------------|----|----|-----|-----|-----|
| Consensus C S-gene | S P T S C P P I C P G Y R W M C L R R F I I F L F I L L C L I F L L V L L D Y Q G M L P V C P L L P G T S T T S T G P |    |    |     |     |     |
| C2-8a-1201         | .....                                                                                                                 |    |    |     |     |     |
| C2-8b-1201         | .....                                                                                                                 |    |    |     |     |     |
| C1-11a-1201        | .....H.....V.....                                                                                                     |    |    |     |     |     |
| C1-11b-1201        | .....T.....                                                                                                           |    |    |     |     |     |
| C1-12b-1201        | .....T.....                                                                                                           |    |    |     |     |     |
| C1-27b-1201        | .....                                                                                                                 |    |    |     |     |     |
| C1-31a-1201        | .....*                                                                                                                |    |    |     |     |     |
| C1-31b-1201        | *.....R.....R.....                                                                                                    |    |    |     |     |     |
| C1-33a-1201        | .....T..G..K.....N.....                                                                                               |    |    |     |     |     |
| C1-33b-1201        | .....T.S..K.....N.....                                                                                                |    |    |     |     |     |
| C2-50a-1201        | .....W.....                                                                                                           |    |    |     |     |     |
| C2-50b-1201        | .....W.....                                                                                                           |    |    |     |     |     |
| C2-51a-1201        | .....L..R.....A.V.....STN...LS                                                                                        |    |    |     |     |     |
| C2-51b-1201        | .....L..R.....A.V.....STN...LS                                                                                        |    |    |     |     |     |
| C2-52a-1201        | ..C..T.....                                                                                                           |    |    |     |     |     |
| C2-52b-1201        | ..C..T.....                                                                                                           |    |    |     |     |     |
| C2-53a-1201        | ..C..T.....                                                                                                           |    |    |     |     |     |
| C2-53b-1201        | ..C..T.....                                                                                                           |    |    |     |     |     |
| C2-54a-1201        | .....W.....                                                                                                           |    |    |     |     |     |
| C2-54b-1201        | .....W.....                                                                                                           |    |    |     |     |     |
| C2-55a-1201        | .....W.....                                                                                                           |    |    |     |     |     |
| C2-55b-1201        | .....W.....                                                                                                           |    |    |     |     |     |



|                    | 190 | 200                  | 210             | 220        |
|--------------------|-----|----------------------|-----------------|------------|
| Consensus C S-gene | QW  | FVGLSPTVWLSVIWMMWYWG | PSLYNILSPFLPLLP | IFFCLWVYI* |
| C2-8a-1201         |     |                      |                 |            |
| C2-8b-1201         |     |                      |                 |            |
| C1-11a-1201        |     |                      | N.              | T.         |
| C1-11b-1201        |     | A.                   | H.              | NH.        |
| C1-12b-1201        |     | A.                   | H.              | NH.        |
| C1-27b-1201        |     |                      | N.              |            |
| C1-31a-1201        |     |                      | N.              |            |
| C1-31b-1201        |     |                      | N.              |            |
| C1-33a-1201        |     |                      | N.              |            |
| C1-33b-1201        |     |                      | N.              |            |
| C2-50a-1201        |     |                      |                 |            |
| C2-50b-1201        |     |                      |                 |            |
| C2-51a-1201        |     | T.                   | N.              | L.         |
| C2-51b-1201        |     | T.                   | N.              | L.         |
| C2-52a-1201        | A.  | L.                   |                 | T.         |
| C2-52b-1201        | A.  | L.                   |                 | T.         |
| C2-53a-1201        | A.  | L.                   |                 | T.         |
| C2-53b-1201        | A.  | L.                   |                 | CT         |
| C2-54a-1201        |     |                      |                 |            |
| C2-54b-1201        |     |                      |                 |            |
| C2-55a-1201        |     |                      |                 |            |
| C2-55b-1201        |     |                      |                 |            |
| C2-56a-1201        |     |                      |                 |            |
| C2-56b-1156        |     |                      |                 |            |
| C2-57a-1201        | A.  |                      |                 |            |
| C2-57b-1201        | A.  |                      |                 |            |
| C2-58b-1201        |     | A.                   | F.              |            |
| C2-59b-1201        |     | A.                   | F.              |            |
| C2-62a-1201        |     |                      |                 |            |
| C2-62b-1156        |     |                      |                 |            |
| C1-63a-1201        |     | E.                   | T.              | N.         |
| C2-64a-1201        |     |                      | R.              | W.         |
| C2-64b-1201        |     |                      | R.              | W.         |
